# Supplementary material for: The Role of Protective Surface Coatings on the Thermal Stability of Delithiated Ni-Rich Layered Oxide Cathode Materials
Source: MDPI journal article supplement (doi:10.3390/batteries9050245), 2023-04-25
Supplement: s1 [file s1]

## Supporting Information

### **On the role of protective surface coatings on the thermal stability of delithiated Ni-rich layered oxide cathode materials**

*Friederike Reissig, Joaquin Ramirez-Rico, Tobias Placke, Martin Winter, Richard Schmuch\*, Aurora Gomez-Martin\**

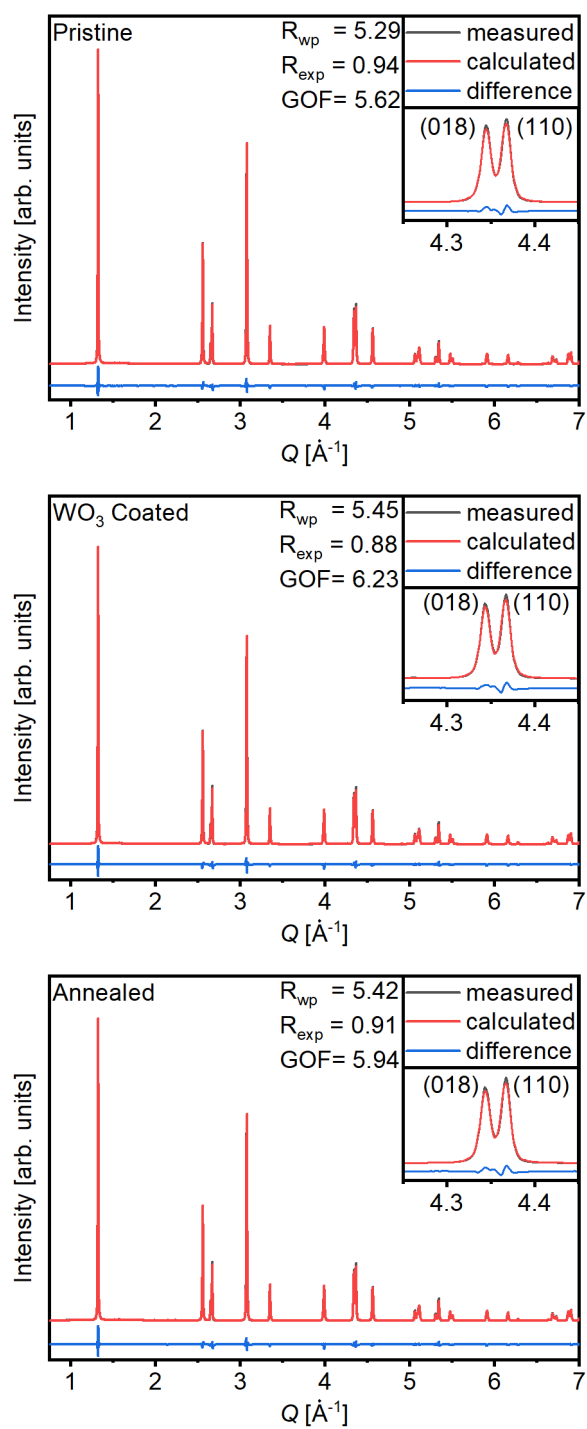

**Figure S1.** Rietveld refinements of the NCM materials showing measured (grey), calculated (red) data as well as the difference between them (blue).  $R_{wp}$ ,  $R_{exp}$  and goodness of fit (GOF) are shown as well. The inlayer shows the (108)/(110) reflections split up indicating a well-defined layered structure.

**Table S1.** Information on the structural parameters used for the refinement as well as introduction of the refined parameters  $z(\text{O})$ ,  $\text{Li}_{\text{mix}}$ ,  $\text{beq}(\text{O})$  and  $\text{beq}(\text{TM})$ .

| Atom | Wyckoff Site | $x$ or $a$ | $y$ or $b$ | $z$ or $c$    | Occupancy                       | Isotropic thermal factor<br>beq |
|------|--------------|------------|------------|---------------|---------------------------------|---------------------------------|
| O    | 6c           | 0          | 0          | $z(\text{O})$ | 1                               | $\text{beq}(\text{O})$          |
| Li1  | 3a           | 0          | 0          | 0             | $1.00 - \text{Li}_{\text{mix}}$ | 2                               |
| Ni2  | 3a           | 0          | 0          | 0             | $\text{Li}_{\text{mix}}$        | 2                               |
| Ni1  | 3b           | 0          | 0          | 0.5           | $0.90 - \text{Li}_{\text{mix}}$ | $\text{beq}(\text{TM})$         |
| Co1  | 3b           | 0          | 0          | 0.5           | 0.05                            | $\text{beq}(\text{TM})$         |
| Mn1  | 3b           | 0          | 0          | 0.5           | 0.05                            | $\text{beq}(\text{TM})$         |
| Li2  | 3b           | 0          | 0          | 0.5           | $\text{Li}_{\text{mix}}$        | $\text{beq}(\text{TM})$         |

**Table S2.** Results of the Rietveld refinements: R-weighted pattern ( $R_{\text{wp}}$ ), R expected ( $R_{\text{exp}}$ ), goodness of fit (GOF), lattice parameters  $a$  and  $c$ , unit cell volume ( $V$ ), Li - Ni mixing ( $\text{Li}_{\text{mix}}$ ),  $z$ -Position and isotropic thermal factors. (beq)

| Modification                 | Pristine            |                 | WO <sub>3</sub> Coated |                 | Annealed            |                 |
|------------------------------|---------------------|-----------------|------------------------|-----------------|---------------------|-----------------|
| $R_{\text{wp}}$              | 5.29                |                 | 5.45                   |                 | 5.42                |                 |
| $R_{\text{exp}}$             | 0.94                |                 | 0.88                   |                 | 0.91                |                 |
| GOF                          | 5.62                |                 | 6.23                   |                 | 5.94                |                 |
|                              | Main phase          | Secondary phase | Main phase             | Secondary phase | Main phase          | Secondary phase |
| Percentage                   | 66.26               | 28.26           | 71.87                  | 22.11           | 71.74               | 22.33           |
| $a$ [ $10^{-10}\text{m}$ ]   | 2.8760(5)           | 2.8777(9)       | 2.8761(5)              | 2.878(1)        | 2.8766(5)           | 2.878(1)        |
| $c$ [ $10^{-10}\text{m}$ ]   | 14.204(2)           | 14.201(6)       | 14.206(2)              | 14.201(7)       | 14.209(2)           | 14.202(7)       |
| $V$ [ $10^{-30}\text{m}^3$ ] | 101.75(4)           | 101.85(7)       | 101.77(4)              | 101.88(9)       | 101.82(4)           | 101.92(9)       |
| $c/a$                        | 4.9388              | 4.9348          | 4.9396                 | 4.934           | 4.9397              | 4.9339          |
| $\text{Li}_{\text{mix}}$     | $0.0393 \pm 0.0005$ |                 | $0.0350 \pm 0.0006$    |                 | $0.0345 \pm 0.0006$ |                 |
| Li - Ni mixing [%]           | $3.93 \pm 0.05$     |                 | $3.50 \pm 0.06$        |                 | $3.45 \pm 0.06$     |                 |
| $z(\text{O})$                | 0.242(1)            | 0.239(3)        | 0.242(1)               | 0.237(4)        | 0.242(1)            | 0.238(4)        |
| $\text{beq}(\text{O})$       | 0.9(1)              |                 | 0.9(1)                 |                 | 0.9(1)              |                 |
| $\text{beq}(\text{TM})$      | 0.34(2)             |                 | 0.36(2)                |                 | 0.35(9)             |                 |

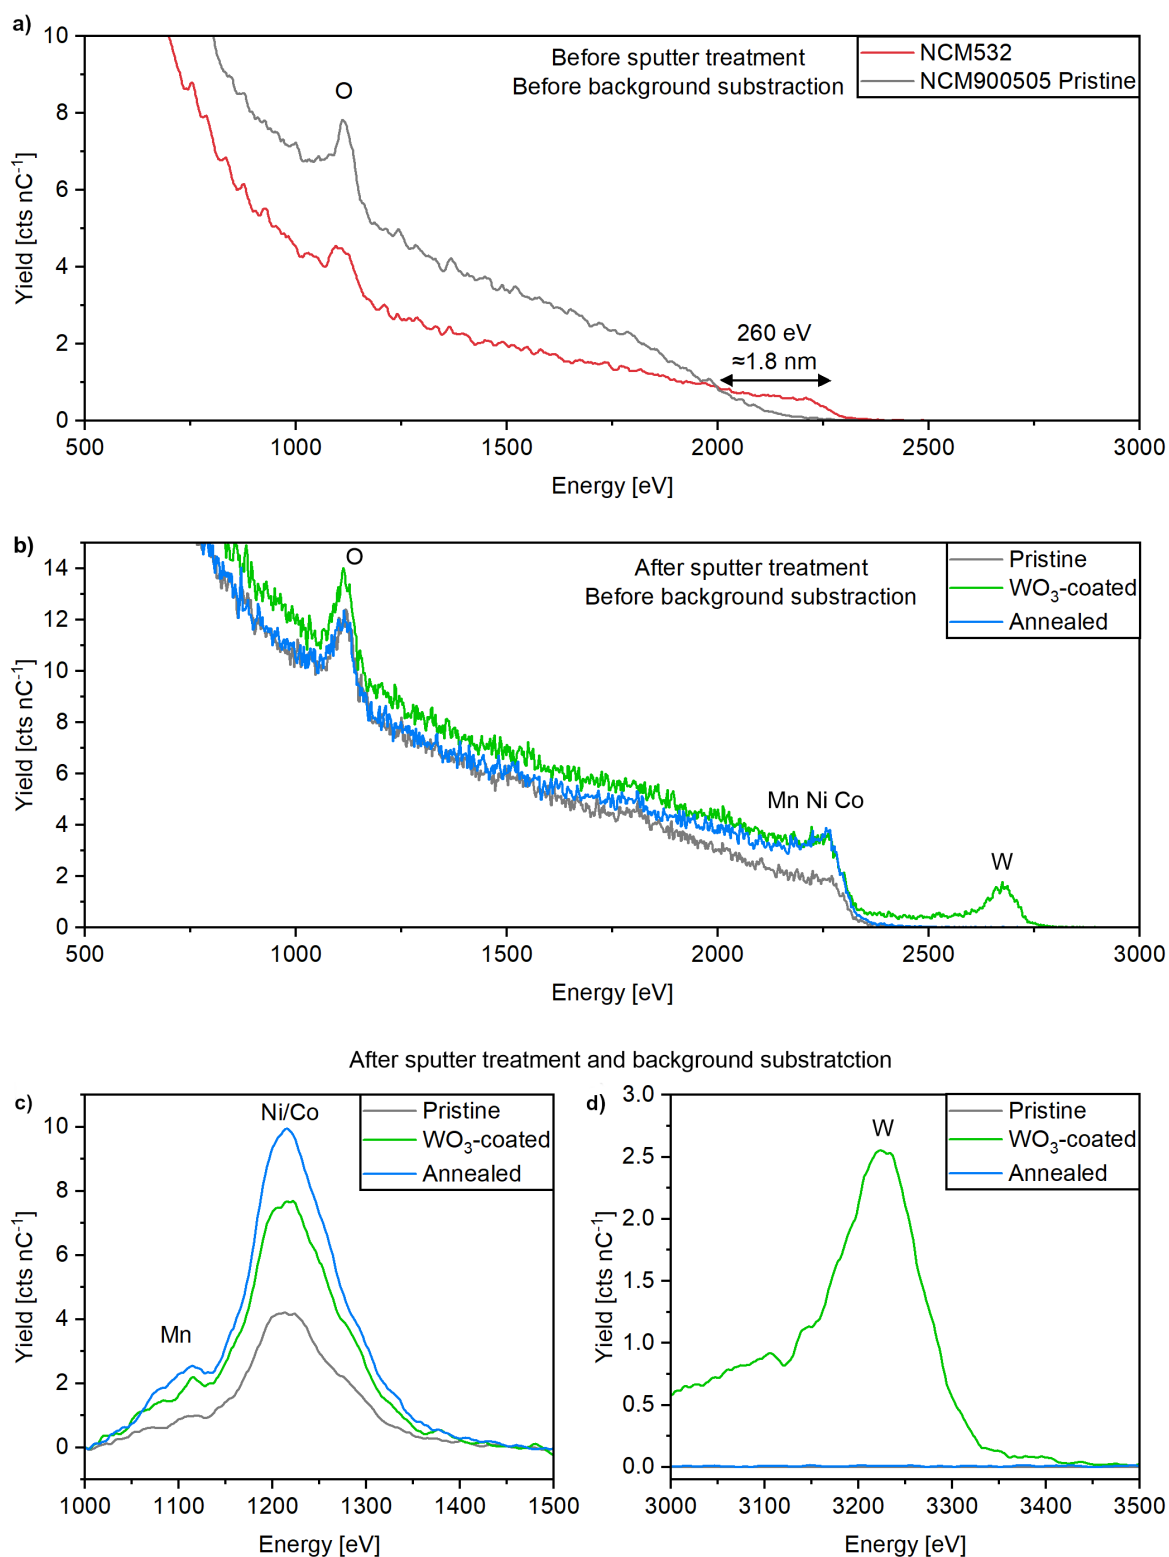

**Figure S2.** LEIS results. **(a)** Comparison of 3 keV  $^4\text{He}^+$  spectra for the pristine sample and an NCM532 reference before the sputter treatment. The difference in background indicates a thick layer of surface residues. **(b)** 3 keV  $^4\text{He}^+$  spectra for the samples in set 2 after the sputter treatment. **(c, d)** 5 keV  $^{20}\text{Ne}^+$  spectra after background subtraction and smoothing. **(c)** Mn/Co/Ni region and **(d)** W region.

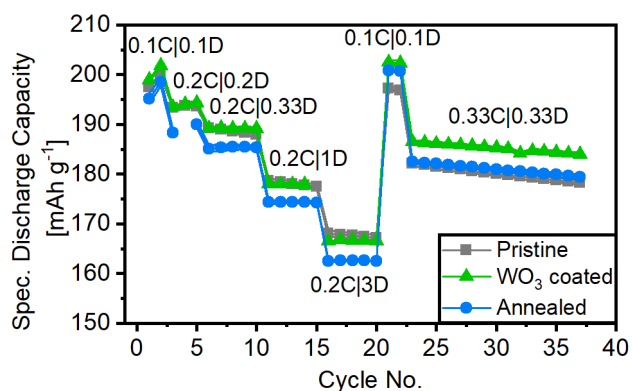

**Figure S3.** Rate capability investigations in NCM || Li metal cells. Specific discharge capacity vs. cycle number. Cell voltage range: 2.9 - 4.3 V (1C = 190 mA g<sup>-1</sup>). Error bars: standard deviation of three cells for each sample. The missing data point in cycle 4 for the annealed sample resulted from a short power outage. 1 C=190 mA g<sup>-1</sup>.

**Table S3.** Results of long-term stability investigation in NCM || graphite full-cells. The given errors are the standard deviation of three cells per sample.

|                              | Initial Coulombic efficiency [%] | Initial discharge capacity at 0.1 C after formation [mAh g <sup>-1</sup> ] | Initial discharge capacity at 0.33 C [mAh g <sup>-1</sup> ] | End of life (<80% SOH) reached in cycle: |
|------------------------------|----------------------------------|----------------------------------------------------------------------------|-------------------------------------------------------------|------------------------------------------|
| <b>Pristine</b>              | 85.80 ± 0.04                     | 193.91 ± 0.03                                                              | 186.05 ± 0.03                                               | 163                                      |
| <b>WO<sub>3</sub> Coated</b> | 85.9 ± 0.3                       | 192 ± 1                                                                    | 184 ± 1                                                     | 344                                      |
| <b>Annealed</b>              | 84.0 ± 0.2                       | 190.3 ± 0.1                                                                | 180 ± 1                                                     | 328                                      |

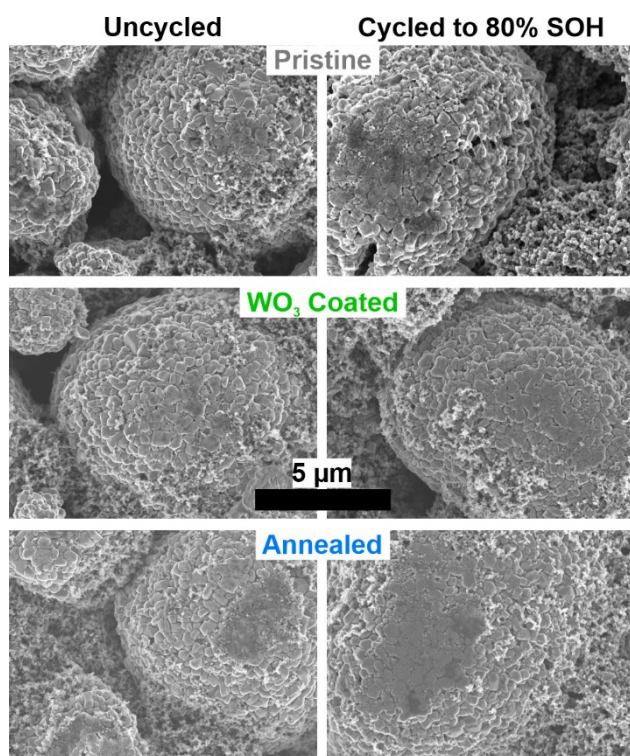

**Figure S4.** SEM images with a magnification of 10kx of various electrodes before (left) and after (right) cycling until 80% SOH was reached.

**Table S4.** Results of the differential scanning calorimetry of cathode materials delithiated to  $\text{Li}_{0.31}\text{Ni}_{0.90}\text{Co}_{0.05}\text{Mn}_{0.05}\text{O}_2$ . Integrated specific heat flow without and with fresh electrolyte.

| Integrated heat flow [ $\text{W K g}^{-1}$ ] | Without electrolyte | With fresh electrolyte |
|----------------------------------------------|---------------------|------------------------|
| <b>Pristine</b>                              | 353.5               | 81.8                   |
| <b>WO<sub>3</sub>-coated</b>                 | 250.9               | 72.0                   |
| <b>Annealed</b>                              | 214.5               | 92.1                   |

**Table S5.** Results of the differential scanning calorimetry of cathode materials delithiated to  $\text{Li}_{0.31}\text{Ni}_{0.90}\text{Co}_{0.05}\text{Mn}_{0.05}\text{O}_2$ . Temperatures for the position of the first peak max and where the decomposition onset of  $0.2 \text{ W g}^{-1}$  for the specific heat flow is exceeded.

|                              | Position 1 <sup>st</sup> maximum [ $^{\circ}\text{C}$ ] | Onset T [ $^{\circ}\text{C}$ ]<br>(spec. heat flow $> 0.2 \text{ W g}^{-1}$ ) |
|------------------------------|---------------------------------------------------------|-------------------------------------------------------------------------------|
| <b>Pristine</b>              | 206                                                     | 192                                                                           |
| <b>WO<sub>3</sub>-coated</b> | 208 and 212                                             | 199                                                                           |
| <b>Annealed</b>              | 208                                                     | 190                                                                           |

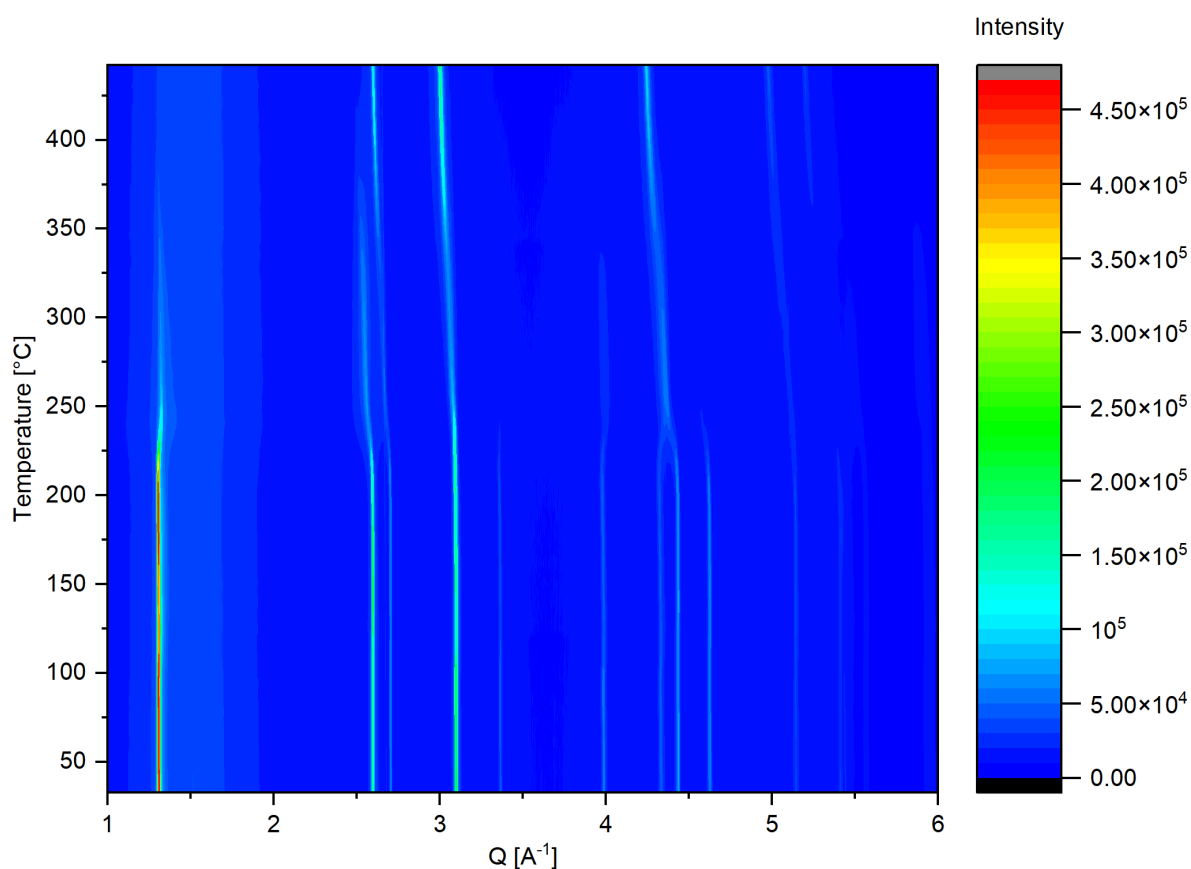

**Figure S5.** Diffraction pattern contour plot of the delithiated pristine material. Cathode powders in a quartz capillary were heated from room temperature to 400°C using the ITQ-ALBA capillary flow reaction cell.

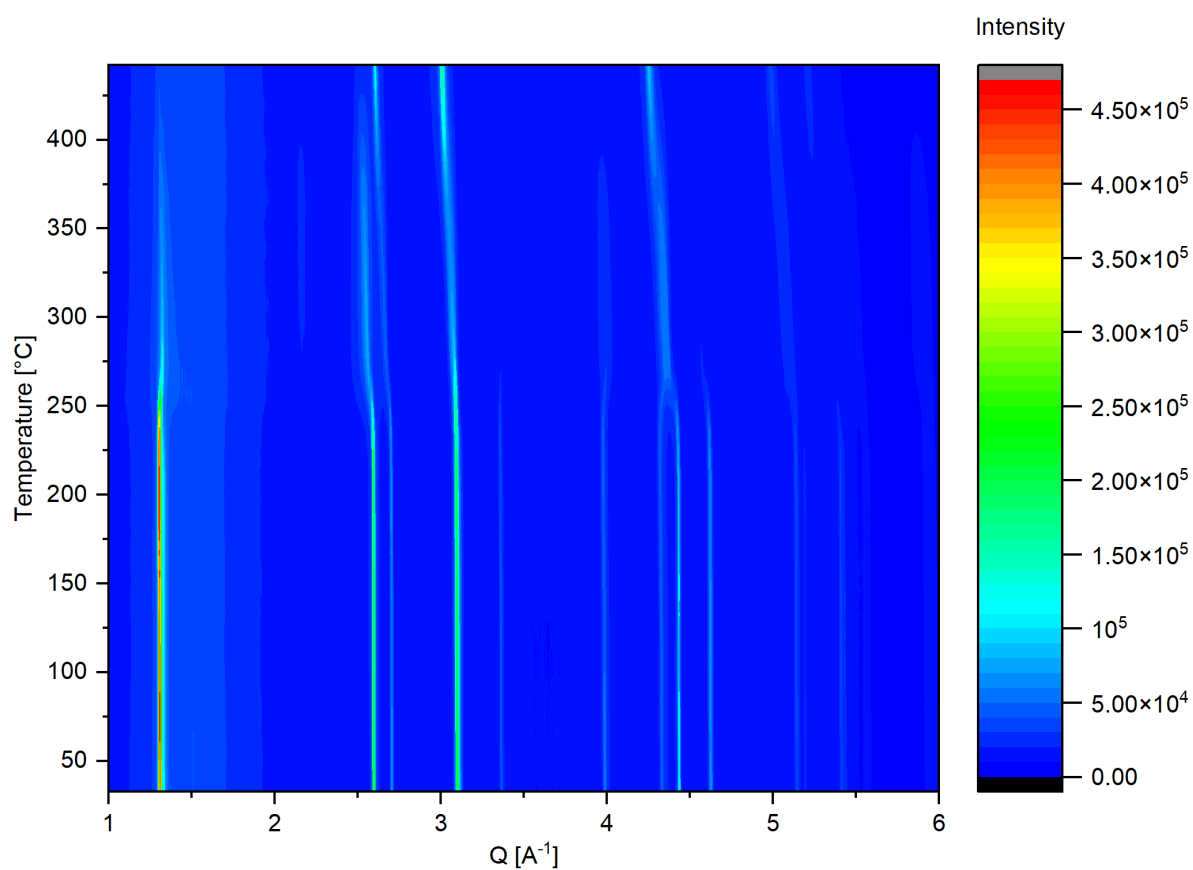

**Figure S6.** Diffraction pattern contour plot of delithiated  $\text{WO}_3$ -coated material. Cathode powders in a quartz capillary were heated from room temperature to 400°C using the ITQ-ALBA capillary flow reaction cell.

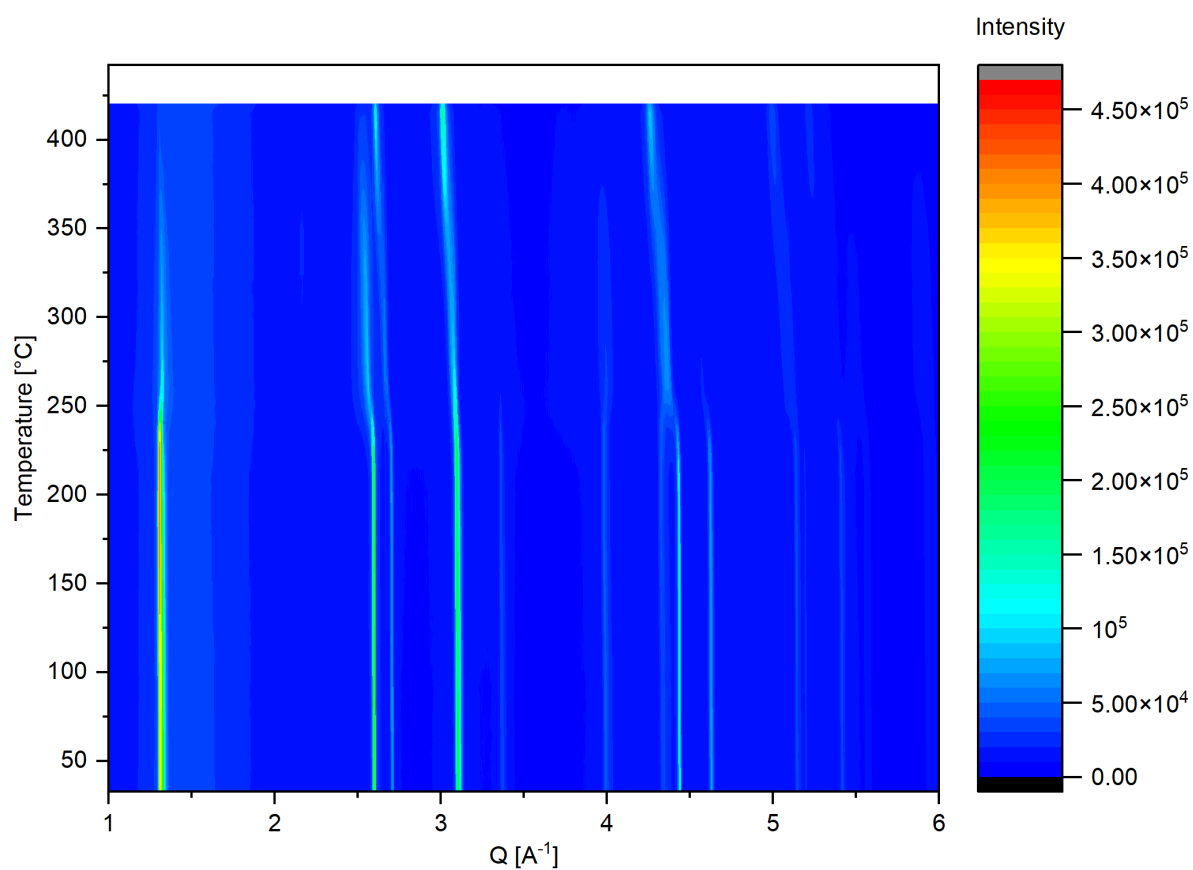

**Figure S7.** Diffraction patterns contour plot of delithiated annealed material. Cathode powders in a quartz capillary were heated from room temperature to 400°C using the ITQ-ALBA capillary flow reaction cell.



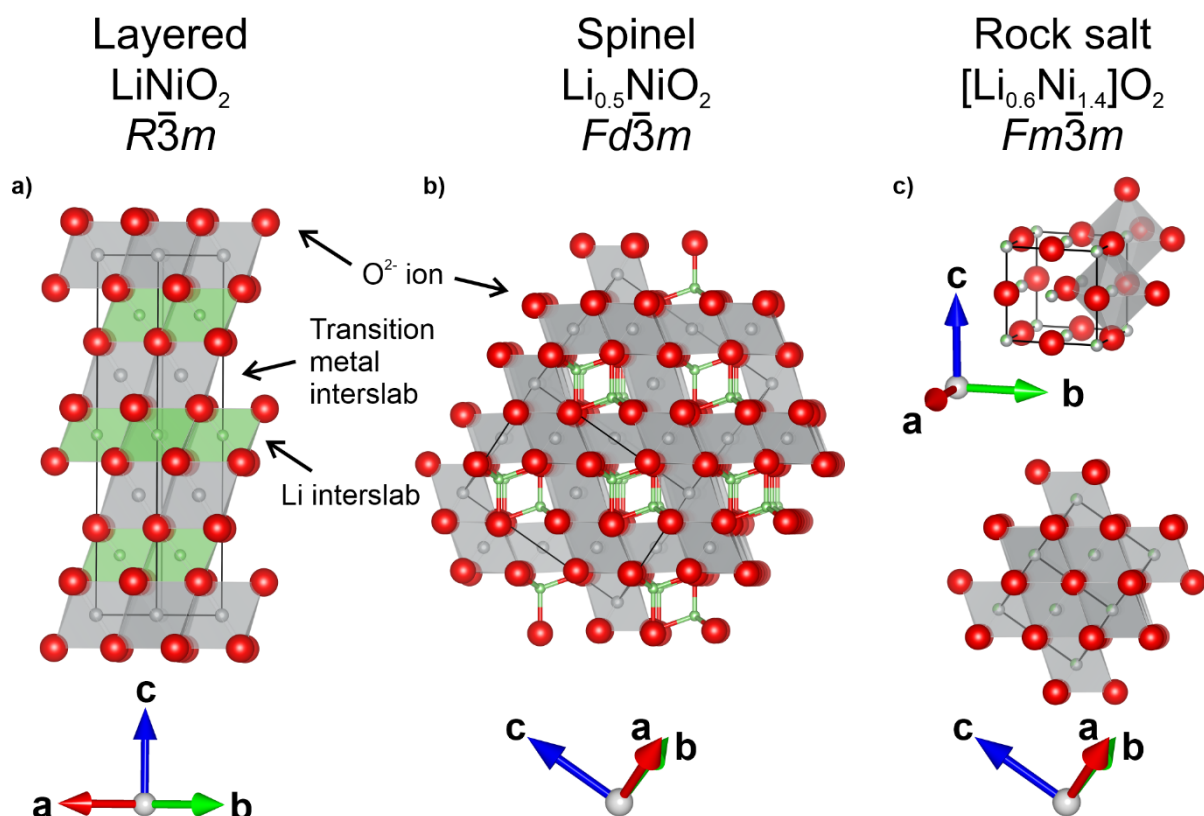

**Figure S8.** Comparison of the crystallographic structures with the different Li-Ni-O stoichiometries and a cubic close packing oxygen sublattice. Oxygen ions are displayed in red, Li ions are displayed in green and Ni ion are displayed in grey. For reasons of better visibility only Ni is shown as transition metal. Coordination spheres are shown either as transparent octahedra or tetrahedra as ball-stick model.

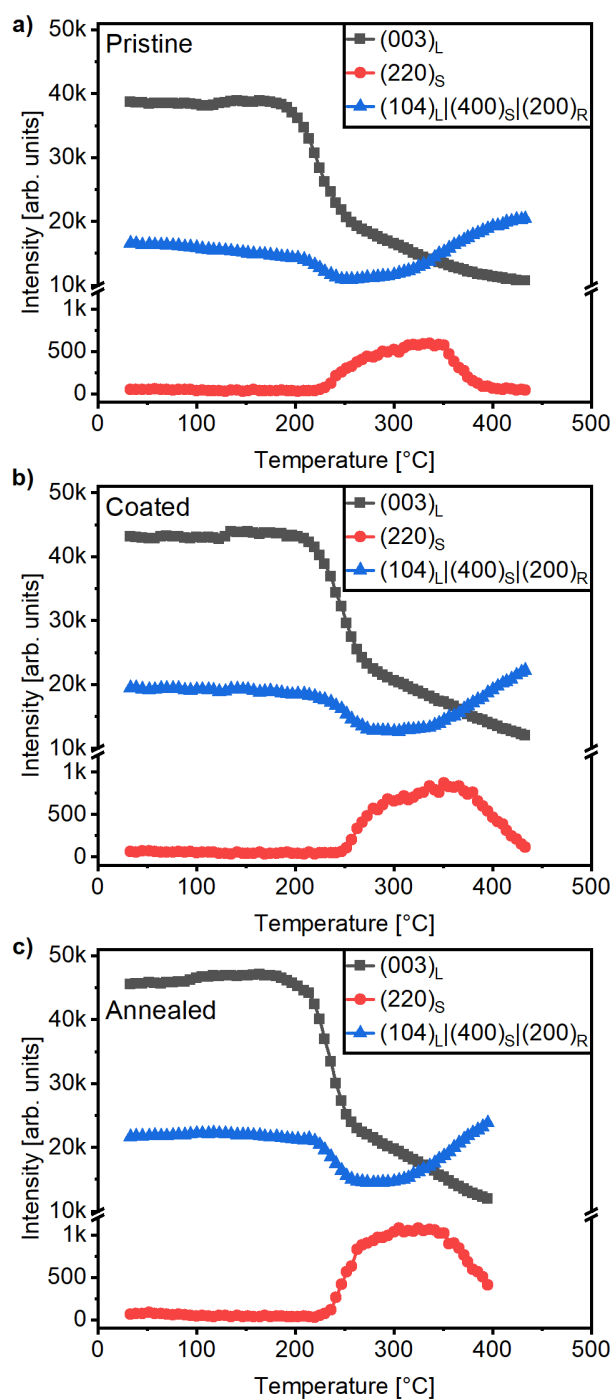

**Figure S9.** Phase evolutions as derived from the disappearance and appearance of selected characteristic reflections of the layered ((003)<sub>L</sub> and (104)<sub>L</sub>), the spinel ((220)<sub>S</sub> and (400)<sub>S</sub>) and the rock salt phases (200)<sub>R</sub>.
